# Supplementary material for: Ecosystem service assessment under ecological restoration programs: A systematic review of studies from China
Source: Frontiers journal article supplement (doi:10.3389/fevo.2023.1152907), 2023-03-23
Supplement: Table_1.XLSX [file Table_1.XLSX]

## Sheet: Sheet1
Author	Year	Geographical location	Ecosystem services (ESs)	Whether to consider interactions among ESs	Temporal scales	Spatial scales	Approach	Driver factors	Reference
Zhu et al.	2019	Shaanxi, Shanxi, Ningxia and Inner Mongolia	Soil conservation	No	Short-term	Regional level	Model method	The Grain for Green Project	Zhu, M., He, W., Zhang, Q., et al. (2019). Spatial and temporal characteristics of soil conservation service in the area of the upper and middle of the Yellow River, China. Heliyon, 5(12):e02985.
Zhou et al.	2021	Zhejiang	Sediment retention	No	Short-term	Regional level	Model method	Ecological Conservation Red Line policy	Zhou, M., Deng, J., Lin, Y., et al. (2021). Evaluating combined effects of socio-economic development and ecological conservation policies on sediment retention service in the Qiantang River Basin, China. Journal of Cleaner Production, 286:124961.
Zhou et al.	2020	Gansu	Carbon storage	No	Short-term	Regional level	Model method	The Grain for Green Project and the Key Treatment Program of Shiyang River Basin	Zhou, J., Zhao, Y., Huang, P., et al. (2020). Impacts of ecological restoration projects on the ecosystem carbon storage of inland river basin in arid area, China. Ecological Indicators, 118:106803.
Zheng et al.	2014	Shaanxi	Soil conservation, water retention, water yield and crop production	Yes	Short-term	Regional level	Model method	The Grain for Green Project	Zheng, Z., Fu, B., Hu, H., et al. (2014). A method to identify the variable ecosystem services relationship across time: a case study on Yanhe Basin, China. Landscape Ecology, 29(10): 1689-1696.
Zhao et al.	2020	Qinghai, Gansu, Ningxia, Shaanxi, Shanxi, Inner Mongolia and Henan Province	Soil erosion	No	Short-term	Regional level	Model method	The Grain for Green Project	Zhao, J., Feng, X., Deng, L., et al. (2020). Quantifying the Effects of Vegetation Restorations on the Soil Erosion Export and Nutrient Loss on the Loess Plateau. Frontiers in Plant Science, 11:573126.
Zhang et al.	2015	Guangxi	Carbon sequestration	No	Short-term	County level	Model method	The Grain for Green Project	Zhang, M., Wang, K., Liu, H., et al. (2015). How ecological restoration alters ecosystem services: an analysis of vegetation carbon sequestration in the karst area of northwest Guangxi, China. Environmental Earth Sciences, 74(6): 5307-5317.
Zhang et al.	2018	Inner Mongolia, Xinjiang, Qinghai, Tibet, Sichuan, Yunnan, Gansu and Ningxia	Carbon sequestration, water regulation, sand fixation, soil retention and grassland yield	Yes	Short-term	Regional level	Model method	The Grazing Withdrawal Program	Zhang, H., Fan, J., Cao, W., et al. (2018). Changes in multiple ecosystem services between 2000 and 2013 and their driving factors in the Grazing Withdrawal Program, China. Ecological Engineering, 116: 67-79.
Xu et al.	2019	Qinghai	Soil organic carbon sequestration, soil total nitrogen sequestration, biodiversity and aboveground biomass	Yes	Short-term	County level	Field measurement	No specific	Xu, Y., Dong, S., Gao, X., et al. (2019). Trade-offs and cost-benefit of ecosystem services of revegetated degraded alpine meadows over time on the Qinghai-Tibetan Plateau. Agriculture Ecosystems & Environment, 279: 130-138.
Xiao,et al.	2019	Chongqing and Hubei	Soil conservation	No	Long-term	Regional level	Model method	The Grain for Green Project	Xiao, Q., Xiao, Y., Tan, H. (2019). Changes to soil conservation in the Three Gorges Reservoir Area between 1982 and 2015. Environmental Monitoring and Assessment 192:44.
Xia et al.	2021	Liaoning	Soil conservation, water purification and water yield	No	Short-term	County level	Model method	No specific	Xia, H., Kong, W., Zhou, G., et al. (2021). Impacts of landscape patterns on water-related ecosystem services under natural restoration in Liaohe River Reserve, China. Science of The Total Environment, 792:148290.
Wu et al.	2014	Inner Mongolia	Soil carbon and nitrogen storage	No	Short-term	County level	Field measurement	Returning Grazing Lands to Grasslands	Wu, X., Li, Z., Fu, B., et al. (2014). Restoration of ecosystem carbon and nitrogen storage and microbial biomass after grazing exclusion in semi-arid grasslands of Inner Mongolia. Ecological Engineering, 73: 395-403.
Wu et al.	2019	Shanxi, Shaanxi, Henan, Ningxia, Gansu, Qinghai and Inner Mongolia	Carbon sequestration, water regulation, soil conservation and sand fixation	Yes	Short-term	Regional level	Model method	The Grain for Green Project	Wu, D., Zou, C., Cao, W., et al. (2019). Ecosystem services changes between 2000 and 2015 in the Loess Plateau, China: A response to ecological restoration. PLoS One, 14(1): e0209483..
Wen et al.	2019	Shaanxi	Soil erosion and water yield	Yes	Short-term	Regional level	Model method	The Grain for Green Project	Wen, X., Deng, X., Zhang, F., et al. (2019). Scale effects of vegetation restoration on soil and water conservation in a semi-arid region in China: Resources conservation and sustainable for management. Resources Conservation and Recycling, 151:104474.
Wen	2020	Shaanxi	Soil erosion	No	Long-term	Regional level	Model method	The Grain for Green Project	Wen, X. (2020). Temporal and spatial relationships between soil erosion and ecological restoration in semi-arid regions: a case study in northern Shaanxi, China. Giscience & Remote Sensing, 57(4): 572-590.
Wei et al.	2017	Shaanxi	Grain production, water yield and net primary production	No	Short-term	Regional level	Model method	The Grain for Green Project	Wei, H., Fan, W., Ding, Z., et al. (2017). Ecosystem Services and Ecological Restoration in the Northern Shaanxi Loess Plateau, China, in Relation to Climate Fluctuation and Investments in Natural Capital. Sustainability, 9(2): 199.
Wang et al.	2020	Sichuan, Chongqing, Hubei, Hunan, Yunnan, Guizhou, Guangdong, and Guangxi	Water yield, soil conservation and net primary production	Yes	Long-term	Regional level	Model method	The Grain for Green Project	Wang, X., Zhang, X., Feng, X., et al. (2020). Trade-offs and Synergies of Ecosystem Services in Karst Area of China Driven by Grain-for-Green Program. Chinese Geographical Science 30(1): 101-114.
Wang et al.	2020	Shanxi, Inner Mongolia	Sand-fixing service	No	Short-term	Regional level	Model method	Beijing-Tianjin Sandstorm Source Control Project	Wang, S., Zhang, B., Xie, G., et al. (2020). Vegetation cover changes and sand -fixing service responses in the sandstorm source control area. Environmental Development, 34:100455.
Wang et al.	2017	Yunnan	Soil conservation, net primary production and water yield	Yes	Short-term	County level	Model method	The Grain for Green Project	Wang, J., Peng, J., Zhao, M., et al. (2017). Significant trade-off for the impact of Grain-for-Green Programme on ecosystem services in North-western Yunnan, China. Science of The Total Environment, 574: 57-64.
Wang et al.	2021	all over the country	Water erosion	No	Short-term	National level	Model method	The Grain for Green Project	Wang, H., Zhao, W., Li, C., et al. (2021). Vegetation greening partly offsets the water erosion risk in China from 1999 to 2018. Geoderma, 401:115319.
Tang et al.	2019	Heilongjiang, Xinjiang, Shanxi, Ningxia, Tibet, Henan, Anhui, Hubei, Jiangxi, Hunan, Yunnan, Guizhou, Guangxi, Hainan, Jilin, Liaoning, Tianjin, Qinghai, Gansu, Shaanxi, Inner Mongolia, Chongqing, Hebei, Beijing and Sichuan	Net primary productivity, soil water loss, soil wind loss and water regulation	Yes	Short-term	National level	Model method	The Grain for Green Project	Tang, Y., Shao, Q., Liu, J., et al. (2019). Did Ecological Restoration Hit Its Mark? Monitoring and Assessing Ecological Changes in the Grain for Green Program Region Using Multi-source Satellite Images. Remote Sensing, 11(3): 358.
Tan et al.	2021	Shaanxi	Entertainment, esthetics, cultural heritage, physical and mental health, education and science, inspiration, sense of place, religious and spiritual services, and social relations	No	Short-term	County level	Questionnaire survey	The Grain for Green Project	Tan, Q., Gong, C., Li, S., et al. (2021). Impacts of ecological restoration on public perceptions of cultural ecosystem services. Environmental Science and Pollution Research, 28(42): 60182-60194.
Shi et al.	2021	Shaanxi	Soil organic carbon storage, soil water content, soil total nitrogen storage and soil conservation service	Yes	Short-term	Regional level	Field measurement	The Grain for Green Project	Shi, P., Li, Z., Li, P., et al. (2021). Trade-offs Among Ecosystem Services After Vegetation Restoration in China's Loess Plateau. Natural Resources Research, 30(3): 2703-2713.
Rao et al.	2016	Sichuan, Chongqing and Yunnan, Guizhou	Soil conservation	No	Short-term	Regional level	Model method	The Grain for Green Project	Rao, E., Yi, X., Ouyang Z., et al. (2016). Changes in ecosystem service of soil conservation between 2000 and 2010 and its driving factors in southwestern China. Chinese Geographical Science, 26(2): 165-173.
Qi et al.	2021	Guangxi	Net ecosystem productivity, soil conservation and water yield	Yes	Short-term	County level	Model method	The Grain for Green Project	Qi, X., Li, Q., Yue, Y., et al. (2021). Rural-Urban Migration and Conservation Drive the Ecosystem Services Improvement in China Karst: A Case Study of HuanJiang County, Guangxi. Remote Sensing, 2021, 13, 566.
Qi et al.	2019	Shaanxi, Henan, Hubei, Gansu, Sichuan and Chongqing	Water yield, water purification and soil conservation	No	Short-term	County level	Model method	No specific	Qi, W., Li, H., Zhang, Q., et al. (2019). Forest restoration efforts drive changes in land-use/land-cover and water-related ecosystem services in China's Han River basin. Ecological Engineering, 126: 64-73.
Niu and Shao	2020	Guizhou	Soil conservation	No	Short-term	Regional level	Model method	Natural Forest Protection Project,Wildlife Conservation Nature Reserve, Key PublicWelfare Forest Project, Shelterbelt Forest Project, Grain for Green Project and Comprehensive Control Project of Rocky Desertificatio	Niu, L., Shao, Q. (2020). Soil Conservation Service Spatiotemporal Variability and Its Driving Mechanism on the Guizhou Plateau, China. Remote Sensing, 12(14): 2187;.
Mao et al.	2019	Heilongjiang, Jilin and Liaoning	Water yield, ecosystem carbon storage, soil retention, sandstorm evention, habitat provision and food production	No	Short-term	Regional level	Model method	No specific	Mao, D., He, X., Wang, Z., et al. (2019) Diverse policies leading to contrasting impacts on land cover and ecosystem services in Northeast China. Journal of Cleaner Production, 240, 117961.
Ma et al.	2021	Qinghai, Gansu and Sichuan	Water yield, net primary productivity and soil conservation	Yes	Short-term	Regional level	Model method	No specific	Ma, S., Wang, L., Jiang, J., et al. (2021). Threshold effect of ecosystem services in response to climate change and vegetation coverage change in the Qinghai-Tibet Plateau ecological shelter. Journal of Cleaner Production, 318: 128592.
Luo et al.	2019	Shaanxi	Food provisioning, soil retention, carbon sequestration, hydrological regulation,water purification, habitat provisioning for biodiversity	Yes	Long-term	Regional level	Model method	No specific	Luo, Y., Lu, Y., Fu, B., et al. (2019) Half century change of interactions among ecosystem services driven by ecological restoration: Quantification and policy implications at a watershed scale in the Chinese Loess Plateau. Science of The Total Environment, 651, 2546-2557.
Lu et al.	2012	Qinghai, Gansu, Ningxia, Shaanxi, Shanxi, Inner Mongolia and Henan	Water regulation, soil conservation, carbon sequestration, grain production	Yes	Short-term	Regional level	Model method	The Grain for Green Project	Lu, Y., Fu, B., Feng, X., et al. (2012) A Policy-Driven Large Scale Ecological Restoration: Quantifying Ecosystem Services Changes in the Loess Plateau of China. PLoS One, 7(2).
Lu et al.	2015	Shaanxi	Soil carbon sequestration	No	Short-term	Regional level	Model method	The Grain for Green Project	Lu, N., Akujarvi, A., Wu, X., et al. (2015) Changes in soil carbon stock predicted by a process-based soil carbon model (Yasso07) in the Yanhe watershed of the Loess Plateau. Landscape Ecology, 30(3), 399-413.
Lu et al.	2018	all over the country	Carbon sequestration	No	Short-term	National level	Model method	Forest Protection, Grassland Conservation, North Shelter Forest fourth, Sand Control, the Grain for Green Project, River Shelter Forest second	Lu, F., Hu, H., Sun, W., et al. (2018). Effects of national ecological restoration projects on carbon sequestration in China from 2001 to 2010. Proceedings of the National Academy of Sciences of the United States of America, 115(16): 4039-4044.
Lu et al.	2021	Qinghai, Gansu, Ningxia, Shaanxi, Shanxi, Inner Mongolia and Henan	Water provision and regulation services	No	Short-term	Regional level	Model method	No specific	Lu, D. and Y. Lu (2021). Spatiotemporal variability of water ecosystem services can be effectively quantified by a composite indicator approach. Ecological Indicators, 130: 108061.
Lu et al.	2018	Beijing, Hebei, Henan, Gansu, Shannxi, Shanxi, Inner Mongolia, Xinjiang and Ningxia	Groundwater	No	Long-term	Regional level	Model method	No specific	Lu, C., Zhao, T., Shi, X., et al. (2018). Ecological restoration by afforestation may increase groundwater depth and create potentially large ecological and water opportunity costs in arid and semiarid China. Journal of Cleaner Production, 176: 1213-1222.
Liu et al.	2019	Qinghai, Gansu, Ningxia, Shaanxi, Shanxi, Inner Mongolia and Henan	Water yield, soil retention, net primary productivity, grain yield and meat provision, green land cultural	Yes	Long-term	Regional level	Model method	No specific	Liu, Y., Lu, Y., Fu, B., et al. (2019) Quantifying the spatio-temporal drivers of planned vegetation restoration on ecosystem services at a regional scale. Science of The Total Environment, 650, 1029-1040.
Liu et al.	2016	Jiangxi	Streamflow	No	Long-term	Regional level	Field measurement	No specific	Liu, W., Wei, X., Li, Q., et al. (2016). Hydrological recovery in two large forested watersheds of southeastern China: the importance of watershed properties in determining hydrological responses to reforestation. Hydrology and Earth System Sciences, 20(12): 4747-4756.
Liu et al.	2021	all over the country	Soil conservation, water yield, net primary productivity and food supply	Yes	Long-term	National level	Model method	No specific	Liu, M., Bai, X., Tan, Q., et al. (2021). Monitoring impacts of ecological engineering on ecosystem services with geospatial techniques in karst areas of SW China. Geocarto International, 37(17): 5091-5115.
Liu et al.	2016	Yunnan	Soil water content, soil organic matter, and soil total nitrogen	No	Short-term	Regional level	Field measurement	No specific	Liu, G., Tian, K., Sun, J., et al. (2016). Evaluating the Effects of Wetland Restoration at the Watershed Scale in Northwest Yunnan Plateau, China. Wetlands, 36(1): 169-183.
Liao et al.	2020	Hubei and Chongqing	Net primary productivity	No	Short-term	Regional level	Model method	No specific	Liao, Q., Wang, Z., Huang, C. (2020). Green Infrastructure Offset the Negative Ecological Effects of Urbanization and Storing Water in the Three Gorges Reservoir Area, China. International Journal of Environmental Research and Public Health, 17: 8077.
Liang et al.	2021	Henan, Shanxi, Shaanxi, Gansu, Qinghai, Ningxia and Inner Mongolia	Carbon storage	No	Long-term	Regional level	Model method	The Grain for Green Project	Liang, Y., Hashimoto, S., Liu, L. (2021). Integrated assessment of land-use/land-cover dynamics on carbon storage services in the Loess Plateau of China from 1995 to 2050. Ecological Indicators, 120:106939.
Li et al.	2020	Hubei, Anhui, Zhejiang, Fujian, Hunan, Jiangxi, Guangxi and Guangdong	Soil and water conservation	No	Long-term	Regional level	Model method	Soil and Water Conservation Programs	Li, Z., Ning, K., Chen, J., et al. (2020). Soil and water conservation effects driven by the implementation of ecological restoration projects: Evidence from the red soil hilly region of China in the last three decades. Journal of Cleaner Production, 260: 121109.
Li et al.	2017	Shaanxi	Soil conservation, net primary production and water yield	Yes	Short-term	Regional level	Model method	Three-North Shelter Forest Program and the Grain for Green Project	Li, Y., Zhang, L., Qiu, J., et al. (2017). Spatially explicit quantification of the interactions among ecosystem services. Landscape Ecology, 32(6): 1181-1199.
Li et al.	2020	Liaoning	Food mitigation, water purification, soil retention, carbon storages and non-timber product provisioning service	Yes	Short-term	Regional level	Model method	The Grain for Green Project	Li, X., Tian, Y., Gao, T., et al. (2020). Trade-Offs Analysis of Ecosystem Services for the Grain for Green Program: Informing Reforestation Decisions in a Mountainous Headwater Region, Northeast China. Sustainability, 12(11):4762.
Li et al.	2019	Henan, Shanxi, Shaanxi, Gansu, Qinghai, Ningxia and Inner Mongolia	Grain production, oil crop production, livestock supply, water supply, carbon sequestration, erosion control, baseflow regulation, N retention, P retention and forest recreation	Yes	Short-term	Regional level	Model method	The Grain for Green Project and the Natural Forest Protection Projects	Li, T., Lü, Y., Fu, B., et al. (2019). Bundling ecosystem services for detecting their interactions driven by large-scale vegetation restoration: enhanced services while depressed synergies. Ecological Indicators, 99: 332-342.
Li et al.	2016	Shaanxi	Runoff	No	Long-term	Regional level	Field measurement	The Natural Forest Conservation project and the Grain for Green project	Li, S., Liang, W., Fu, B., et al. (2016) Vegetation changes in recent large-scale ecological restoration projects and subsequent impact on water resources in China's Loess Plateau. Science of The Total Environment, 569, 1032-1039.
Li et al.	2021	Hebei	Soil erosion and surface water runoff	No	Long-term	Regional level	Model method	The Three-North Shelter Forest Program and the Beijing-Tianjin Sandstorm Source Control Project	Li, R., Zheng, H., O’Connor, P., et al. (2021). Time and space catch up with restoration programs that ignore ecosystem service trade-offs. Science Advances, 7(14):eabf8650.
Li et al.	2019	Qinghai, Sichuan, Gansu, Ningxia, Inner Mongolia, Shanxi, Shaanxi, Henan and Shandong	Flood regulation	No	Long-term	Regional level	Model method	The Grain for Green Project	Li, P., Sheng, M., Yang, D., et al. (2019). Evaluating flood regulation ecosystem services under climate, vegetation and reservoir influences. Ecological Indicators, 107:105642
Li et al.	2018	Qinghai	Avifauna diversity	No	Short-term	Regional level	Field measurement	No specific	Li, L., Tietze, D., Fritz, A., et al. (2018). Rewilding cultural landscape potentially puts both endemism at risk: A Tibetan Plateau case study. Biological Conservation, 224: 75-86.
Li et al.	2017	Qinghai	Water yield	No	Short-term	Regional level	Model method	No specific	Li, J., Liu, D., Wang, T., et al. (2017). Grassland restoration reduces water yield in the headstream region of Yangtze River. Scientific Reports, 7: 2162
Kong et al.	2018	Sichuan, Qinghai, Yunnan, Chongqing, Gansu, Shaanxi, Henan, Hubei, Hunan, Anhui, Jiangsu, Zhejiang, Shanghai, Jiangxi and Guizhou	Soil conservation	No	Short-term	Regional level	Model method	The Grain for Green Project	Kong, L., Zheng, H., Rao, E., et al. (2018). Evaluating indirect and direct effects of eco-restoration policy on soil conservation service in Yangtze River Basin. Science of The Total Environment, 631-632: 887-894.
Jiang et al.	2020	Heilongjiang, Shaanxi, Ningxia, Jilin, Liaoning, Qinghai, Gansu, Inner Mongolia and Hebei	Net primary productivity	No	Short-term	Regional level	Model method	The Wildlife Protection and Nature Reserve Development Program, the Beijing and Tianjin Sand Control Program, the Grain for Green Program, the Three Norths Shelter Forest System Project, the Natural Forest Conservation Program	Jiang, H., Xu, X., Guan, M., et al. (2020). Determining the contributions of climate change and human activities to vegetation dynamics in agro-pastural transitional zone of northern China from 2000 to 2015. Science of The Total Environment, 718:134871.
Jiang et al.	2020	Shanxi, Ningxia, Shaanxi, Inner Mongolia, Qinghai, Gansu, and Henan,	Soil erosion	No	Long-term	Regional level	Model method	The Natural Forest Protection Project, Grain for Green Project, Soil and Water Conservation Programs	Jiang, C., Zhao, L., Dai, J., et al. (2020). Examining the soil erosion responses to ecological restoration programs and landscape drivers: A spatial econometric perspective. Journal of Arid Environments, 183:104255.
Jiang et al.	2016	Qinghai	Water conservation, soil conservation, carbon sequestration and habitat quality	No	Short-term	Regional level	Model method	No specific	Jiang, C., Zhang, L. (2016). Effect of ecological restoration and climate change on ecosystems: a case study in the Three-Rivers Headwater Region, China. Environmental Monitoring and Assessment, 188(6):382.
Jiang et al.	2016	Qinghai	Soil conservation, water conservation, carbon sequestration and species conservation	No	Short-term	Regional level	Model method	No specific	Jiang, C., Zhang, L. (2016) Ecosystem change assessment in the Three-river Headwater Region, China: Patterns, causes, and implications. Ecological Engineering, 93, 24-36.
Jiang et al.	2018	Qinghai, Gansu, Ningxia, Shaanxi, Shanxi, Inner Mongolia, Henan Province	Soil retention, carbon sequestration and hydrological regulation	Yes	Short-term	Regional level	Model method	The Grain for Green Project	Jiang, C., Zhang, H., Zhang, Z. (2018) Spatially explicit assessment of ecosystem services in China's Loess Plateau: Patterns, interactions, drivers, and implications. Global and Planetary Change, 161, 41-52.
Jiang et al.	2019	Qinghai, Gansu, Ningxia, Shaanxi, Shanxi, Inner Mongolia and Henan	Soil erosion and soil retention, runoff	Yes	Short-term	Regional level	Model method	Soil and Water Conservation Programs	Jiang, C., Zhang, H., Wang, X., et al. (2019). Challenging the land degradation in China's Loess Plateau: Benefits, limitations, sustainability, and adaptive strategies of soil and water conservation. Ecological Engineering, 127: 135-150.
Jiang et al.	2021	Qinghai, Gansu, Ningxia, Shaanxi, Shanxi, Inner Mongolia, and Henan provinces, Yunnan, Guizhou and Guangxi	soil erosion and sediment yield	Yes	Long-term	Regional level	Model method	Soil and Water Conservation Programs	Jiang, C.,Yang, Z., Liu, C., et al. (2021). Win-win-win pathway for ecological restoration by balancing hydrological, ecological, and agricultural dimensions: Contrasting lessons from highly eroded agroforestry. Science of The Total Environment, 774:145140.
Jiang et al.	2019	Shanxi, Ningxia, Shaanxi, Inner Mongolia, Qinghai, Gansu and Henan,	Soil retention and water yield	Yes	Short-term	Regional level	Model method	Soil and Water Conservation Programs	Jiang, C., Wang, X., Zhang, H., et al. (2019). Re-orienting ecological restoration in degraded drylands for a more sustainable soil-water relationship: Non-linear boundary of limited water resources in combating soil loss. Journal of Arid Environments, 167: 87-100.
Jiang et al.	2016	Shanxi, Ningxia, Shaanxi, Inner Mongolia, Qinghai, Gansu and Henan	Soil retention, sandstorm prevention, food production, carbon sequestration, hydrological regulation	Yes	Short-term	Regional level	Model method	The Grain for Green Project	Jiang, C., Wang, F., Zhang, H., et al. (2016) Quantifying changes in multiple ecosystem services during 2000-2012 on the Loess Plateau, China, as a result of climate variability and ecological restoration. Ecological Engineering, 97, 258-271.
Jiang et al.	2021	Qinghai, Gansu, Ningxia, Shaanxi, Shanxi, Inner Mongolia, and Henan provinces, Yunnan, Guizhou and Guangxi	Soil retention and water yield	Yes	Long-term	Regional level	Model method	Soil and Water Conservation Programs	Jiang, C., Guo, H., Wei, Y., et al. (2021). Ecological restoration is not sufficient for reconciling the trade-off between soil retention and water yield: A contrasting study from catchment governance perspective. Science of The Total Environment, 754: 142139.
Huang et al.	2019	Inner Mongolia, Heilongjiang and Jilin	Water quantity regulation and purification, decrease of soil loss, protection of soil fertility, carbon fixation, oxygen released, nutrients accumulation, negative ion supply, pollutant absorption, TSP absorption, PM10 absorption, PM2.5 absorption	Yes	Short-term	Regional level	Model method	Natural Forest Conservation Program	Huang, L., Wang, B., Niu, X., et al. (2019) Changes in ecosystem services and an analysis of driving factors for China's Natural Forest Conservation Program. Ecology and Evolution, 9(7), 3700-3716.
Hu et al.	2021	Shanxi	Carbon storage, habitat quality, water yield, and soil conservation	Yes	Short-term	County level	Model method	The Grain for Green Project	Hu, B., Zhang, Z., Han, H., et al. (2021). The Grain for Green Program Intensifies Trade-Offs between Ecosystem Services in Midwestern Shanxi, China. Remote Sensing, 13(19):3966.
Hou et al.	2017	Shanxi	Food productivity, water yield, habitat quality, net primary productivity, recreation capacity	Yes	Short-term	Regional level	Model method	The Grain for Green Project	Hou, Y., Lu, Y., Chen, W., et al. (2017) Temporal variation and spatial scale dependency of ecosystem service interactions: a case study on the central Loess Plateau of China. Landscape Ecology, 32(6), 1201-1217.
Hao et al.	2017	Inner Mongolia	Net primary productivity, soil conservation, soil loss due to wind, water yield and water retention	No	Short-term	Regional level	Model method	The Grain for Green Project	Hao, R., Yu, D., Liu, Y., et al. (2017). Impacts of changes in climate and landscape pattern on ecosystem services. Science of The Total Environment, 579: 718-728.
Han et al.	2017	Qinghai	Net primary roductivity, water yield, soil conservation	Yes	Short-term	Regional level	Model method	No specific	Han, Z., Song, W., Deng, X., et al. (2017) Trade-Offs and Synergies in Ecosystem Service within the Three-Rivers Headwater Region, China. Water, 9(8): 588.
Guo et al.	2021	Guizhou	Soil organic carbon	No	Short-term	County level	Field measurement	No specific	Guo, Z., Zhang, X., Dungait, J., et al. (2021). Contribution of soil microbial necromass to SOC stocks during vegetation recovery in a subtropical karst ecosystem. Science of The Total Environment, 761:143945.
Gong et al.	2019	Gansu	Plant biodiversity service	No	Short-term	Regional level	Model method	The Grain for Green Project, Natural Forest Protection Project, Shelter Forest Project	Gong, J., Xie, Y., Cao, E., et al. (2019) Integration of InVEST-habitat quality model with landscape pattern indexes to assess mountain plant biodiversity change: A case study of Bailongjiang watershed in Gansu Province. Journal of Geographical Sciences, 29(7), 1193-1210.
Ge et al.	2020	Tibet	Soil erosion	No	Long-term	Regional level	Model method	No specific	Ge, R., Xu, K., Wang, X., et al. (2020). Water erosion in the middle reaches of the Brahmaputra in Tibet: Characteristics and driving factors in the recent 30 years. Global Ecology and Conservation, 24:e01343.
Fu et al.	2011	Qinghai, Gansu, Ningxia, Shaanxi, Shanxi, Inner Mongolia and Henan	Soil erosion	No	Short-term	Regional level	Model method	The Grain for Green Project	Fu, B., Liu, Y., Lu, Y., et al. (2011). Assessing the soil erosion control service of ecosystems change in the Loess Plateau of China. Ecological Complexity, 8(4): 284-293.
Fu et al.	2021	Xinjiang	Net primary productivity	No	Short-term	Regional level	Model method	Ecological water transfer projects, River regulation, and natural vegetation enclosure projects	Fu, A., Li, W., Chen, Y., et al. (2021). The effects of ecological rehabilitation projects on the resilience of an extremely drought-prone desert riparian forest ecosystem in the Tarim River Basin, Xinjiang, China. Scientific Reports, 11(1):18485.
Feng et al.	2013	Qinghai, Gansu, Ningxia, Shaanxi, Shanxi, Inner Mongolia and Henan	Carbon sequestration	No	Short-term	Regional level	Model method	The Grain for Green Project	Feng, X., Fu, B., Lu, N., et al. (2013). How ecological restoration alters ecosystem services: an analysis of carbon sequestration in China's Loess Plateau. Scientific Reports, 3 : 2846.
Feng et al.	2020	Shaanxi	Soil erosion control, carbon sequestration and water yield	Yes	Short-term	Regional level	Model method	The Grain for Green Project	Feng, Q., Zhao, W., Hu, X., et al. (2020). Trading-off ecosystem services for better ecological restoration: A case study in the Loess Plateau of China. Journal of Cleaner Production, 257:120469.
Feng et al.	2019	Anhui	Soil resident enzymes	No	Long-term	County level	Field measurement	No specific	Feng, C., Ma, Y., Jin, X., et al. (2019). Soil enzyme activities increase following restoration of degraded subtropical forests. Geoderma, 351: 180-187.
Feng et al.	2017	Anhui	Soil phosphorus, calcium, potassium and magnesium	No	Long-term	County level	Field measurement	No specific	Feng, C., Ma, Y., Fu, S., et al. (2017). Soil Carbon and Nutrient Dynamics Following Cessation of Anthropogenic Disturbances in Degraded Subtropical Forests. Land Degradation & Development, 28(8): 2457-2467.
Dou et al.	2019	Ningxia	Recreational, aesthetic, cultural heritage, mental and physical health, education and science, inspiration, sense of place, religious and spiritual services.	No	Short-term	Regional level	Questionnaire survey	The Grain for Green Project	Dou, Y., Zhen, L., Yu, X., et al. (2019) Assessing the influences of ecological restoration on perceptions of cultural ecosystem services by residents of agricultural landscapes of western China. Science of The Total Environment, 646, 685-695.
Deng et al.	2019	Qinghai, Gansu, Ningxia, Shaanxi, Shanxi, Inner Mongolia and Henan	Soil conservation	No	Short-term	Regional level	Field measurement	The Grain for Green Project	Deng, L., Kim, D., Li, M., et al. (2019) Land-use changes driven by 'Grain for Green' program reduced carbon loss induced by soil erosion on the Loess Plateau of China. Global and Planetary Change, 177, 101-115.
Dai et al.	2020	Tibet, Sichuan and Yunnan	Water yield and soil erosion	No	Long-term	Regional level	Model method	No specific	Dai, E., Yin, L., Wang, Y., et al. (2020). Quantitative Assessment of the Relative Impacts of Land Use and Climate Change on the Key Ecosystem Services in the Hengduan Mountain Region, China. Sustainability, 12(10):4100.
Cao et al.	2019	Qinghai, Gansu, Ningxia, Shaanxi, Shanxi, Inner Mongolia and Henan	Climate regulaion	No	Short-term	Regional level	Model method	The Grain for Green Project	Cao, Q., Wu, J., Yu, D. et al. (2019) The biophysical effects of the vegetation restoration program on regional climate metrics in the Loess Plateau, China. Agricultural and Forest Meteorology, 268, 169-180.
Brandt et al.	2018	Hubei, Hunan, Yunnan, Guizhou, Guangxi, Guangdong, Chongqing and Sichuan	Above-ground biomass	No	Short-term	Regional level	Model method	Natural Forest Protection Project, the Grain for Green Project, Karst Rocky Desertification Comprehensive Control and Restoration Project, the River Shelter Forest Project	Brandt, M., Yue, Y., Wigneron, J., et al. (2018). Satellite-Observed Major Greening and Biomass Increase in South China Karst During Recent Decade. Earths Futur,e 6(7): 1017-1028.
Bai et al.	2021	Shaanxi	Soil conservation	No	Short-term	Regional level	Model method	The Grain for Green Project	Bai, J., Zhou, Z., Zou, Y., et al. (2021). Watershed Drought and Ecosystem Services: Spatiotemporal Characteristics and Gray Relational Analysis. Isprs International Journal of Geo-Information, 10(2):43.
Zhu et al.	2021	Shaanxi	Soil conservation	No	Short-term	Regional level	Model method	The Grain for Green Project	Zhu, Q., Zhou, Z., Liu, T., et al. (2021) Vegetation restoration and ecosystem soil conservation service value increment in Yanhe Watershed, Loess Plateau. Acta Ecologica Sinica (in Chinese with English abstract), 41(7):2557-2570.
Zhu et al.	2018	Sichuan	Water conservation, soil retention, habitat quality	No	Short-term	National level	Model method	No specific	Zhu, J., Lu, H., Wang, H., et al. (2018). Ecosystem health assessment of the Wenchuan earthquake hard-hit disaster areas during the recovery period. Acta Ecological Sinica(in Chinese with English abstract), 38(24):9001-9011.
Zhang et al.	2019	Heilongjiang, Xinjiang, Shanxi, Ningxia, Tibet, Henan, Hubei, Hunan, Yunnan, Guizhou, Guangxi, Guangdong, Jilin, Liaoning, Qinghai, Gansu, Shaanxi, Inner Mongolia, Chongqing, Hebei, Sichuan	Carbon sequestration, food supply, water production, soil conservation,	No	Short-term	National level	Model method	No specific	Zhang, Y., Feng, X., Wang, X., et al. (2019). Comprehensive benefit evaluation of ecological restoration in key fragile ecological areas in China. Acta Ecologica Sinica(in Chinese with English abstract), 39(20):7367-7381.
Zhang et al.	2020	Qinghai, Gansu, Ningxia, Shaanxi, Shanxi, Inner Mongolia and Henan provinces	Soil conservation, water yield and carbon sequestration	No	Short-term	Regional level	Model method	The Grain for Green Project	Zhang, K., Lyu, Y., Fu, B., et al. (2020). The effects of vegetation coverage changes on ecosystem service and their threshold in the Loess Plateau. Acta Geographica Sinica(in Chinese with English abstract), 75(5):949-960
Zhang et al.	2017	Shaanxi and Shanxi	Soil conservation, hydrological regulation and carbon sequestration	No	Short-term	Regional level	Model method	The Grain for Green Project	Zhang, K., Lyu, Y., Fu, B., et al. (2017). Vegetation restoration and its influences on ecosystem services in areas typical of the Loess Plateau. Journal of Ecology and Rural Environment(in Chinese with English abstract), 33(1):23-31.
Yang et al.	2015	Gansu	Vegetation community diversity	No	Short-term	Regional level	Field measurement	Natural Forest Conservation Program	Yang, Q., Wang, Y., Li, J., et al. (2015). Effective analysis on natural forest protection project in national nature reserve of Qilian moutains. Journal of Central South University of Forestry and Technology(in Chinese with English abstract), 35(1):89-95.
Yang et al.	2016	Sichuan	Water and soil conservation, water conservation, and species diversity	No	Short-term	Regional level	Model method	No specific	Yang, M., Xie, Q., Fang, Z., et al. (2016). Assessment of "5.12" Wenchuan earthquake restoration: ecological services function in severely afflicted areas. Resources and Environment in the Yangtze Basin(in Chinese with English abstract), 25(4):685-694.
Wu et al.	2007	Guangxi	Soil conservation	No	Short-term	County level	Field measurement	No specific	Wu, K., Jiang, Z., and Luo, W. (2007). Techniques of ecological restoration and evalution of economic value of their results in Guohua demonstration area. Earth and Environment(in Chinese with English abstract), 35(2):159-165.
Wang et al.	2013	Hunan, Jiangxi and Guangxi	Plant diversiy	No	Long-term	Regional level	Field measurement	No specific	Wang, Y., Ouyang, Z., Zheng, H., et al. (2013). Effects of three forest restoration approaches on plant diversity in red soil region, southern China. Acta Ecologica Sinica(in Chinese with English abstract), 33(4):1204-1211.
Wang et al.	2013	Hunan, Jiangxi and Guangxi	Soil quality	No	Long-term	Regional level	Field measurement	No specific	Wang, Y., Ouyang, Z., Zheng, H., et al. ( 2013). Effects of different forest restoration approaches on soil quality in red soil region of southern China. Acta Ecologica Sinica(in Chinese with English abstract), 24(5): 1335-1340.
Wang et al.	2021	Gansu	Water yield, net primary productivity and soil conservation	No	Short-term	Regional level	Model method	The Grain for Green Project	Wang, Y., Zhao, J., Fu, J. ( 2021). Effects of the Grain for Green Program on the ecosystem services of inland river basin in arid area. Ecological Science(in Chinese with English abstract), 40(6): 56–66.
Wang et al.	2019	Heilongjiang, Xinjiang, Shanxi, Ningxia, Tibet, Henan, Hubei, Hunan, Yunnan, Guizhou, Guangxi, Guangdong, Jilin, Liaoning, Qinghai, Gansu, Shaanxi, Inner Mongolia, Chongqing, Hebei, Sichuan	Water production, net primary productivity and soil conservation	Yes	Long-term	National level	Model method	No specific	Wang, X., Ma, X., Feng, X. (2019). Spatial-temporal characteristics of trade-off and synergy of ecosystem services in key vulnerable ecological areas in China. Acta Ecologica Sinica(in Chinese with English abstract), 39(20): 7344–7355.
Wang et al.	2015	Hebei	Soil conservation, carbon fixation and oxygen released, nutrient accumulation, atmosphere environmental purification	No	Short-term	Regional level	Model method	The Grain for Green Project	Wang, H., Wang, X., Wang, B., et al. (2015). Evaluation of ecological effects of the project of conversion of cropland to forest in Heibe Province. Chinese Journal of Soil Science(in Chinese with English abstract), 13(1): 68-75.
Pei et al.	2018	Shandong	Carbon reservation, habitat quality, material production	No	Long-term	Regional level	Model method	The freshewater restoration projects	Pei, J., Yang, W., Wang, W., et al. Effect of the freshwater restoration projects on ecosystem services in Yellow River Delta wetlands. Journal of Beijing Normal University (Natural Science)(in Chinese with English abstract), 2018, 54(1): 104-112.
Mao et al.	2019	Qinghai	Habitat quality, soil fertility, water purification, atmosphere adjustment and tourism	No	Short-term	Regional level	Field measurement	No specific	Mao, X., Wei, X., Chen, Q., et al. (2019). An ECPS framework based assessment on wetland restoration of the Huangshui NationalWetland Park in Qinghai province, China. Geographical research(in Chinese with English abstract), 38(4): 760-771.
Ma et al.	2018	Shaanxi	Sediment retention, water supply	No	Short-term	Regional level	Model method	The Grain for Green Project	Ma, Q., Liu, K., Li, T., et al. (2018). Temporal and spatial variation of grassland dominant ecosystem services under major ecological restoration in Northern Shaanxi province, China. Transcations of the Chinese Society for Agricultural Machinery(in Chinese with English abstract), 49(02): 260-268.
Liu et al.	2018	Liaoning	Water storage, soil conservation, nutrient accumulation, C fixation and O2 release, biodiversity conservation and air quality purification	No	Short-term	Regional level	Model method	The Grain for Green Project	Liu, S., Niu, X., Tao, Y., et al. ( 2018). An Ecological Benefit Assessment of the Grain for Green Project in Liaoning Province. Journal of Temperate Forestry Research(in Chinese with English abstract), 1(02): 26-33+47.
Li et al.	2019	Inner Mongolia	Food production, raw material, water supply, gas regulation, climate regulation, purify environment, hydrological regulation, soil retention, nutrient cycling, biodiversity, aesthetic	No	Short-term	Regional level	Model method	No specific	Li, J., Feng, C. ( 2019). Ecosystem service values and ecological improvement based on land use change: a case study of theInner Mongolia Autonomous Region. Acta Ecologica Sinica(in Chinese with English abstract),39(13): 4741-4750.
Kang et al.	2017	Qinghai	Soil conservation	No	Short-term	Regional level	Model method	No specific	Kang, H., Pan, T., Gui, A., et al. (2017). Effect of ecological degradation and restoration on soil conservation function in Three-Rivers Headwater region. Bulletin of Soil and Water Conservation(in Chinese with English abstract), 37(03): 7-14.
Cao et al.	2021	Sichuan	Carbon storage, habitat quality, water conservation, soil conservation	No	Short-term	Regional level	Model method	The Grain for Green Project	Cao, M., Cai, Y., Zhang, L., et al. (2021). Temporal and spatial variation of typical ecosystem services in Wolong Nature Reserve. Acta Ecologica Sinica(in Chinese with English abstract), 41(23): 9341-9353.
